# Supplementary material
Source: PubMed Central journal article supplement (PMC5388561)
Supplement: NIHMS794561-supplement-01.pdf [file NIHMS794561-supplement-01.pdf]

**Figure S1. No difference in NTDs scored at 9.5 versus 11.5 dpc.** Percent of embryos dissected at 9.5 or 11.5 dpc from dams fed control (yellow bar), high folic acid (10 ppm, orange bar), high iron (0.5% carbonyl iron, blue bar) or high folic acid and iron (purple bar) diets for 4 weeks before mating. Statistical significance was determined by Fisher's Exact Test. All comparisons were non significant (ns).
